# Supplementary material for: Structural insight into the activation mechanism of MrgD with heterotrimeric Gi-protein revealed by cryo-EM
Source: PubMed Central journal article supplement (PMC9287403; doi:10.1038/s42003-022-03668-3), 2022-07-15
Supplement: 42003_2022_3668_MOESM2_ESM.pdf [file 42003_2022_3668_MOESM2_ESM.pdf]

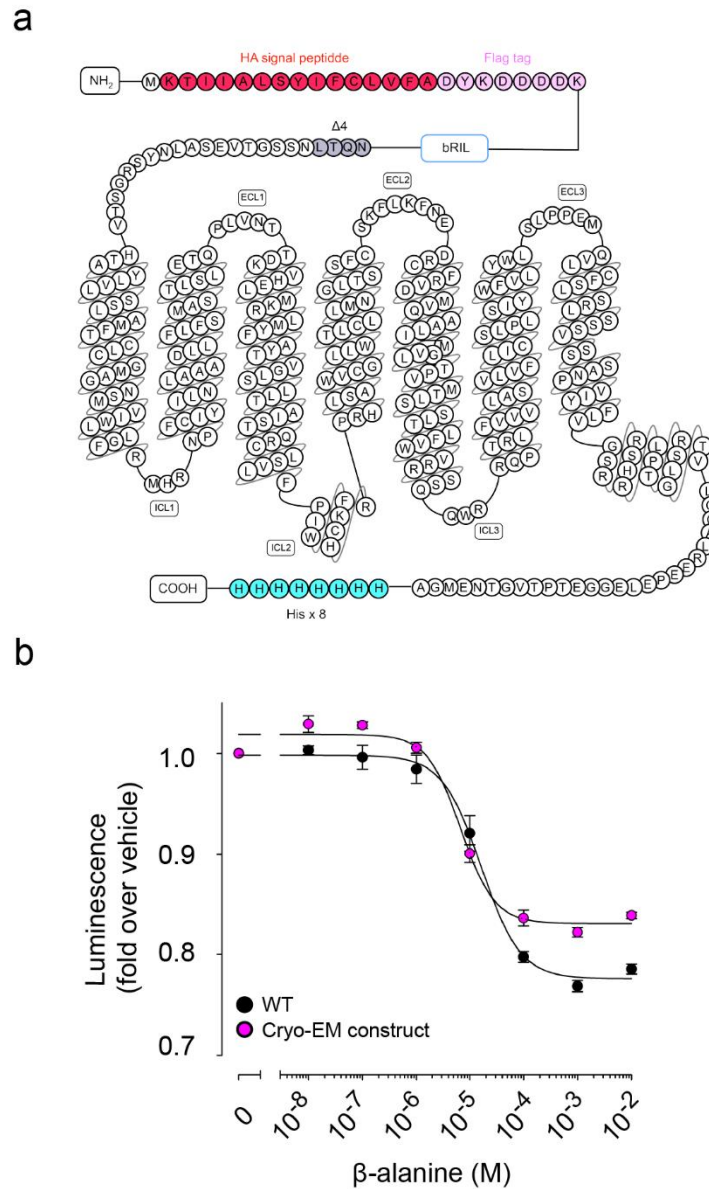

### Supplementary Fig. 1 | Construct of the MrgD

**a** Snake plot of the MrgD construct used in this paper. **b** Comparison of  $\beta$ -alanine induced Gi signaling potency between WT and cryo-EM construct. The Gi coupling activities were measured by the NanoBiT-G-protein dissociation assay. Dose-response curves are shown as means  $\pm$  s.e.m. (standard error of the mean) of six independent experiments for WT and three for the cryo-EM construct

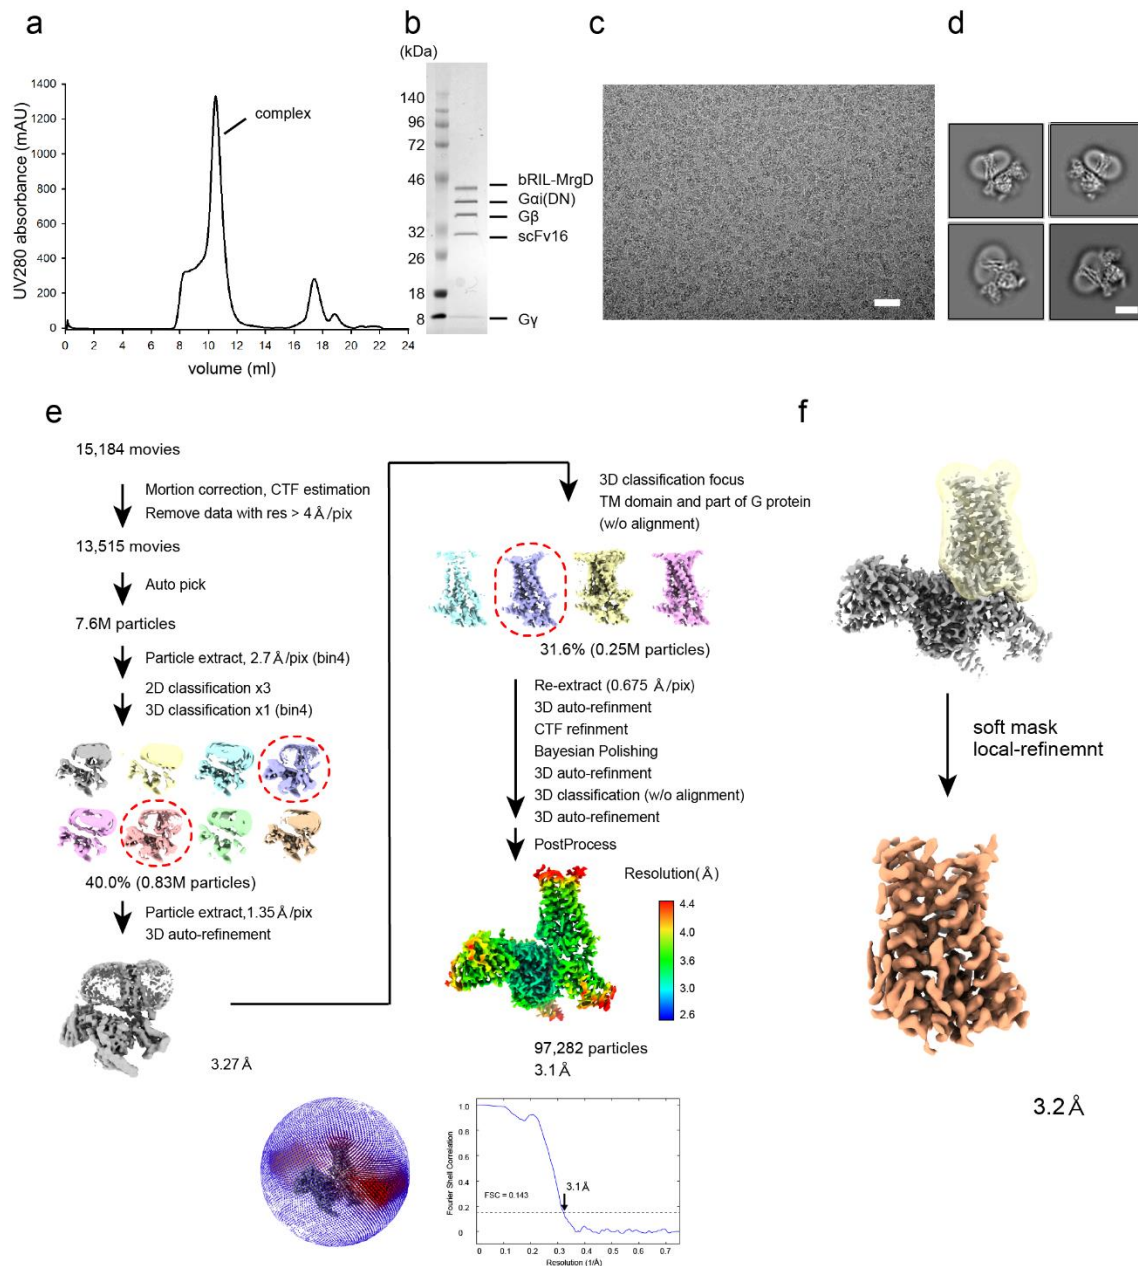

**Supplementary Fig. 2 | Purification and flow chart of cryo-EM single-particle reconstruction of  $\beta$ -alanine-bound MrgD-Gi complex.**

**a** Elution profile of size-exclusion chromatography of the purified  $\beta$ -alanine-bound MrgD-Gi complex. **b** SDS-PAGE and Coomassie brilliant blue stain of the purified complex. **c** A representative micrograph of the  $\beta$ -alanine-bound MrgD-Gi complex (scale bar 30 nm). **d** Representative 2D class average images of the  $\beta$ -alanine-bound MrgD-Gi complex (scale bar 5 nm). **e** Flow chart of the single-particle analysis of the apo-MrgD-Gi complex. Fourier shell correlation (FSC) curve shows 3.1 Å global resolution according to the gold standard criteria

(FSC=0.143). Colors indicate local resolution on the cryo-EM map. **f** Local refinement was performed using a cryoSPARC. The density of the TM domain was significantly improved.

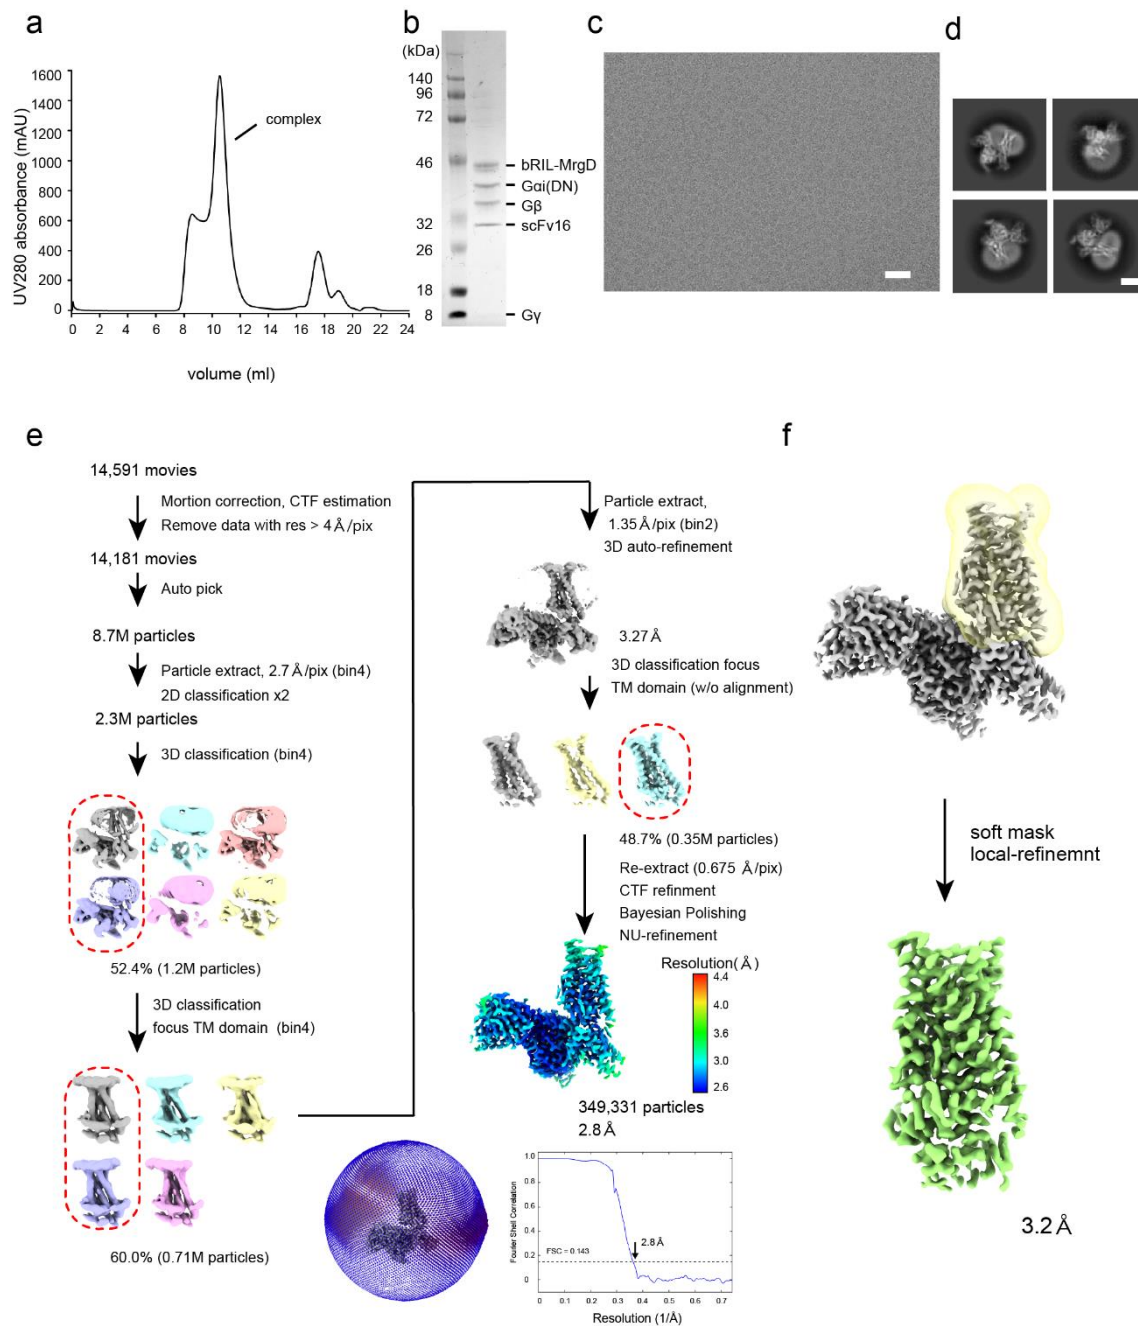

**Supplementary Fig. 3 | Purification and flow chart of cryo-EM single-particle reconstruction of apo MrgD-Gi complex.**

**a** Elution profile of size-exclusion chromatography of the purified apo MrgD-Gi complex. **b** SDS-PAGE and Coomassie brilliant blue stain of the purified complex. **c** A representative micrograph of the apo MrgD-Gi complex (scale bar 30 nm). **d** Representative 2D class average images of the apo MrgD-Gi complex (scale bar 5 nm). **e** Flow chart of the single-particle analysis of the apo MrgD-Gi complex. Fourier shell correlation (FSC) curve shows 2.8 Å global resolution according

to the gold standard criteria (FSC=0.143). Colors indicate local resolution on the cryo-EM map. **f**  
Local refinement was performed using a cryoSPARC. The density of the TM domain was significantly improved.

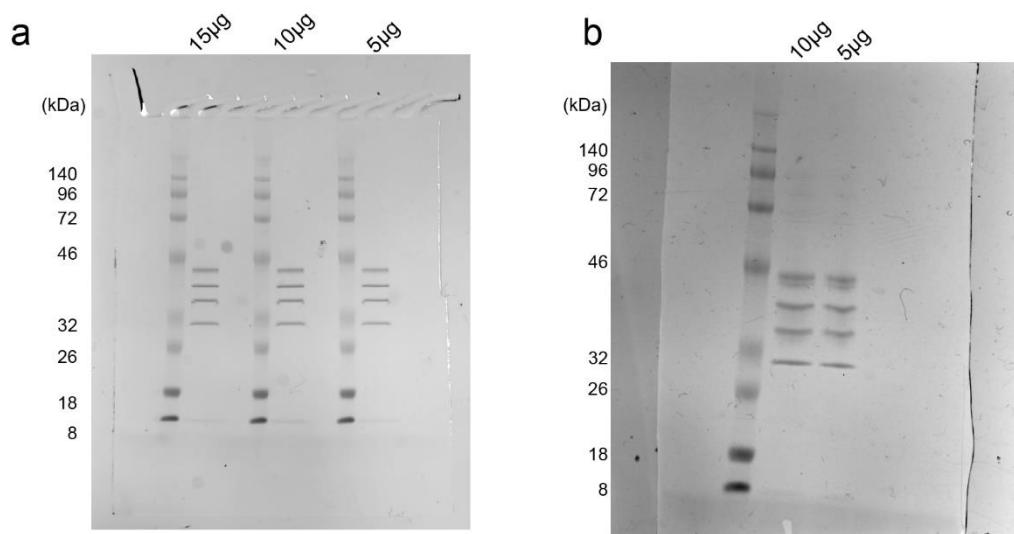

**Supplementary Fig. 4 | uncropped SDS-PAGE gel related supplementary Fig.2b and 3b**

SDS-PAGE of the purified MrgD-Gi complex.  $\beta$ -alanine bound state (a), apo state (b)

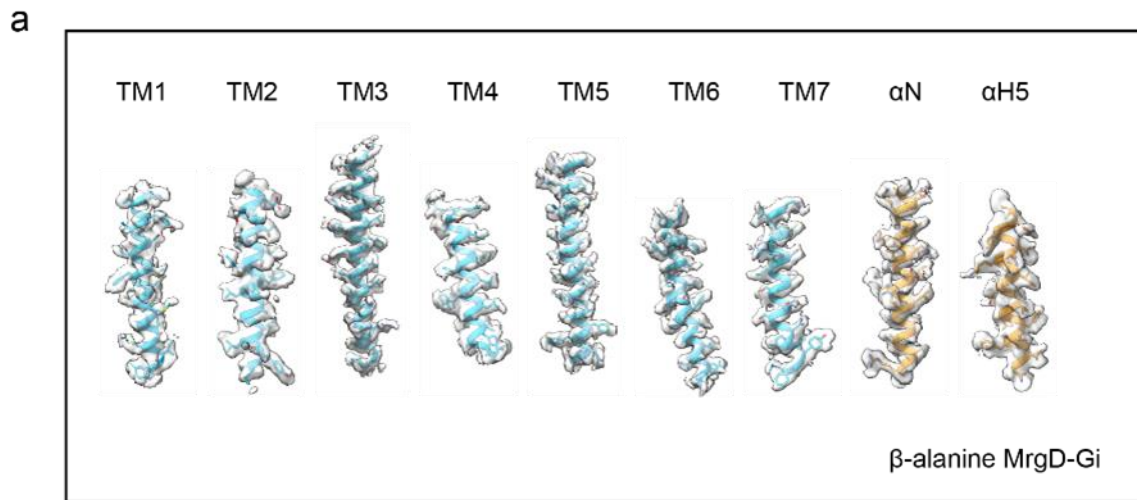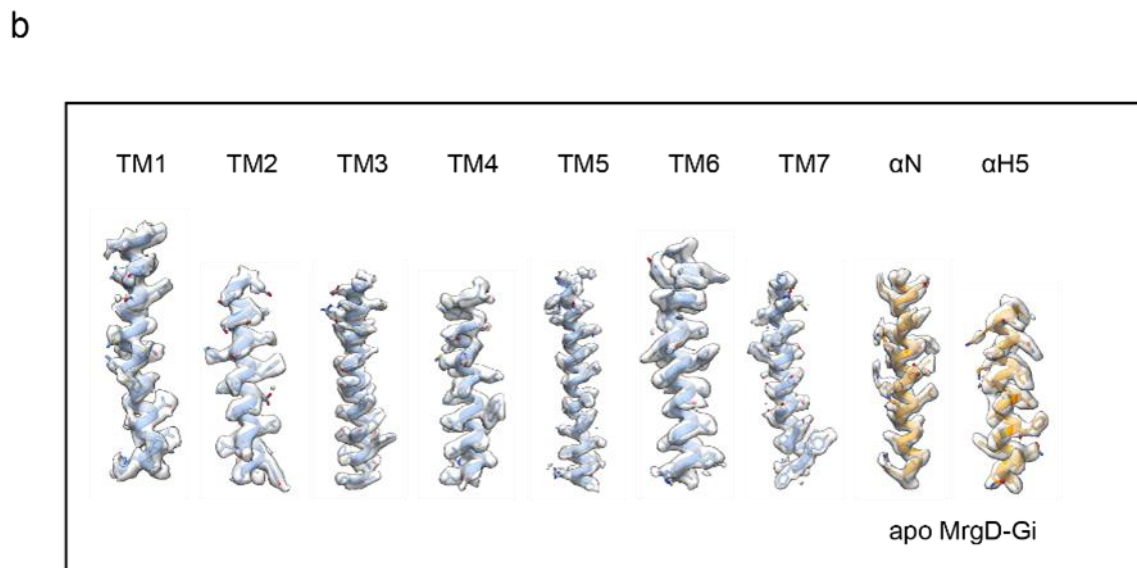

**Supplementary Fig. 5 | Cryo-EM density maps of the  $\beta$ -alanine MrgD-Gi complex and apo MrgD-Gi complex.**

**a,b** Cryo-EM density maps of the seven transmembrane helices and  $\alpha$ N and  $\alpha$ 5 helices of  $G\alpha_i$ . The  $\beta$ -alanine-bound MrgD-Gi complex is shown in (a), and the apo MrgD-Gi complex in (b).

MrgD 1 .....MNQTLNSSGTVESALNYSRGSTV...HTAYLVLSSLAMFTCTCGMA  
MrgE 1 .....MMEPREAGQHVGAANGAQED...VAFNLIILSLTEGLGLGGLL  
MrgF 1 MAGNCSWEAHPGNRNKMCPLSEAPELYSRGFLTIEQIAMLPPPAMVNYIFLLLCGLGGLV  
MrgG 1 .....MFGLPGLWRTF.....DSVVFYLLILVGLGGLPV  
MrgX1 1 .....MDPTIISTLDELTPINGTEETL...CYKQTLSLTVLTCIVSLVGLI  
MrgX2 1 .....MDPTTPAWGTESITVNGNDQALLLCLL...GKETLIPVFLILFIALVGLI  
MrgX3 1 .....MDSTIPVLGTELTIPINGREETPCYKQ...TSLFTGLTCIVSLVGLI  
MrgX4 1 .....MDPTVVPVFGTKLTPINGREETPC...YNQTLISFTVLTICIVSLVGLI  
MasR 1 .....MDGSNVTSFVVVEPTNISTGRNASVGN...AHRQIIVHWVIMSISVGEV

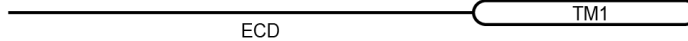

MrgD 44 GNSMVIWLLGFRMHRNFCIYILNLAADLFFLFSMAS TSLDETQ.PLV.NT...IDKVVH  
MrgE 41 GNGAVLWLLSSNVYRNFAYILLDVAGADLFFLFGCHMVAVIPLDLL.QGRLD...PGFVQ  
MrgF 61 GNGLVWVWLFGRFKKGFPSIYFLLHLAGADLVGYLFSKAVFSTLNTGGFLG.TF...ADYTR  
MrgG 29 GNGLVWVWLFGRFKKGFPSIYFLLHLAGADLVGYLFSKAVFSTLNTGGFLG.TF...ADYTR  
MrgX1 44 GNAVVLWLLGFRMRRNFSIYILNLAADLFFLFSGRLLIYSLLSFI.SIP.HT...S  
MrgX2 47 GNGFVWVWLLGFRMRRNFSIYVYVLSLAGADLFFLFCFQIINCLVYLSNFFC.SL...SINFP  
MrgX3 44 GNAVVLWLLGFRMRRNFSIYILNLAADLFFLFSGHIIICSPRLRLI.NIR.HP...S  
MrgX4 44 GNAVVLWLLGFRMRRNFSIYILNLAADLFFLFSFQIIRLRLI.NIS.HL...IR  
MasR 49 BNGILLWVLCFRMRRNFTVYIITHLSTADLFLFCIFLISIDYALDYE...LSSGHYYTI

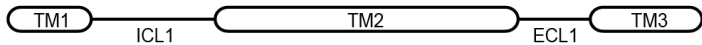

MrgD 99 ELMKRIMYFAYTVCLSLTALISVQRCLSVLFPINFKCHRRPHLSAVVCGTLNLTCLLMLNG  
MrgE 97 TSLATLRFYFYVCLSLLAASVVEQCLAAALFPAWYSCRPRRHLLTCVCLLTLWLSLLVHL  
MrgF 117 SVCRVGLCMFLTGVSLPAVASVVEQCLAAALFPAWYSCRPRRHLLTCVCLLTLWLSLLVHL  
MrgG 79 TLYEVLTELWFAVGLWLLAAFVVERCLSDLFPACYGCRPRRHLSAVVCGTLNLTCLLMLNG  
MrgX1 96 KILYVMMFSPFAGLSFLSAVSTERCLSVLWPIWYRCHRRPHLSAVVCGTLNLTCLLMLNG  
MrgX2 103 SFFITVMTCAVLAGLSMLSTVSTERCLSVLWPIWYRCHRRPHLSAVVCGTLNLTCLLMLNG  
MrgX3 96 KILSPVMTFFPFIGLSMLSAVSTERCLSVLWPIWYRCHRRPHLSAVVCGTLNLTCLLMLNG  
MrgX4 96 KILVSPVMTFFPFIGLSMLSAVSTERCLSVLWPIWYRCHRRPHLSAVVCGTLNLTCLLMLNG  
MasR 106 VTLSVTFVLFVNTGLYILTALISVVERCLSVLWPIWYRCHRRPHLSAVVCGTLNLTCLLMLNG

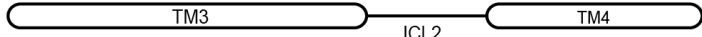

MrgD 159 TSSSFQSKFL...KFNE...DRCFRVDVQAALIMGVITFVMTLSLTLFVWVRR  
MrgE 157 LLSGATQTF...GEP...SRHLCRTLWLVAVLLA.LLCCMCGASLMLLLRVER  
MrgF 177 LHNYPQVFLGR...GAPG...AACRHMDFLGLLFLCCEFLMVLPCLAFLIHVEC  
MrgG 139 TPANACGL...LRNSACPLVCPRYHVASVTFWFLVILARVAMTAGVVLVFWVTC  
MrgX1 156 LEWMFCGFLFSG...ADSAW...CQTSDFITVAVLLI.FLCVVLGCSLVLVLRILC  
MrgX2 163 LECKFCGFLF...SDGD...SGWCQTSDFITVAVLLI.FLMVVLGCSLVLVLRILC  
MrgX3 156 LEWMPGDF...LFGSANSVWCQTSDFITVAVLV.FLCVVLGCSLVLVLRILC  
MrgX4 156 LEWRFCDLFL...SGAD...SSWCQTSDFITVAVLLI.FLCVVLGCSLVLVLRILC  
MasR 166 MEYVMCIDREEESHNRDC...RAVITIEITLSEVLETFMLVLSLTLVVKIKR

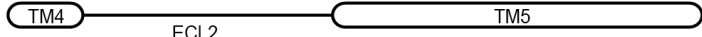

MrgD 208 SSQQW.RRQPTRLFVVVLASVLFVFLICSLFLSLTYWFLYWLISLPPEM...QVLCFSLSR  
MrgE 206 GPQRP.P.P.PRGFPGLILLTVLLFLFCGLPFGIYWLISRNLWY..IP...HYFYHFSF  
MrgF 227 RARRRQR.SAKLNHVLAMVSVFLVSSIYLGIDWFLFWVFOI..PA...PFPEYVTD  
MrgG 188 CS.TR.P.RPRLYGTVLGALLLFFCGLPSVFYMSIQPLINF..LL...PVFSPLAT  
MrgX1 205 GSRKI.P.LT.RLYVTILLTVLFLVLLCGLPFGIQFFFLFWLHV...DREVLVCHVHLSI  
MrgX2 212 GSRGL.P.LT.RLYVTILLTVLFLVLLCGLPFGIQFFFLFWLHV...DREVLVCHVHLSI  
MrgX3 205 GSRKM.P.LT.RLYVTILLTVLFLVLLCGLPFGIQFFFLFWLHV...DREVLVCHVHLSI  
MrgX4 205 GSRKM.P.LT.RLYVTILLTVLFLVLLCGLPFGIQFFFLFWLHV...DREVLVCHVHLSI  
MasR 217 NFWAS.H.SSKLYIVLMVTIIFLIFAMPMLL.VYLLVYEWWS..TF...GNLHHLSL

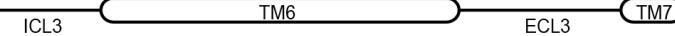

MrgD 163 LSSSVSSSANPIYFVGLVGRSRHRLPTRSLGITV..LQALREPELEGGEIPTVGINEMG  
MrgE 256 LMAAVHCAKPIVYFVCLGSAQGRRLPLRLVLQ...RALGDEAELGAVRSTSRRLGVDIAA  
MrgF 278 LCICINSSAKPEVYFVLAGRDKSQRLEWPLRVVVF..QRALRDGAELGAGGSTPNTVTMEM  
MrgG 237 LLACVNSSAKPIYFVGLVGRSRHRLPTRSLGITV..LQALREPELEGGEIPTVGINEMG  
MrgX1 259 FLNALNSSANPIYFVGLVGRSRHRLPTRSLGITV..LQALQDASEVDEGGGQLPEEILEL  
MrgX2 266 VLSSLNSSANPIYFVGLVGRSRHRLPTRSLGITV..LQALQDASEVDEGGGQLPEEILEL  
MrgX3 259 FLNALNSSANPIYFVGLVGRSRHRLPTRSLGITV..LQALQDASEVDEGGGQLPEEILEL  
MrgX4 259 SLSSLNSSANPIYFVGLVGRSRHRLPTRSLGITV..LQALQDASEVDEGGGQLPEEILEL  
MasR 267 LFSTINSSANPIYFVGLVGRSRHRLPTRSLGITV..LQALQDASEVDEGGGQLPEEILEL

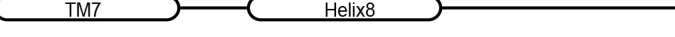

MrgD 321 A.....  
MrgE .....  
MrgF 326 QCPPGNAS.....  
MrgG .....  
MrgX1 316 SGSRLAQ.....  
MrgX2 318 RQGTPEMSRSSLV  
MrgX3 319 RLEQ.....  
MrgX4 316 SGSRLGSP.....  
MasR 324 VV.....



### **Supplementary Fig. 6 | Sequence alignment of MrgD family proteins**

The amino acid sequences of the MRGPR family proteins were aligned with GPCRdb (<http://www.gpcrdb.org>). The residues of the  $\beta$ -alanine binding sites are highlighted with red asterisks. Canonical sodium binding sites are highlighted with green. Superscripts refer to the Ballesteros-Weinstein numbers. The ovals represent the helical secondary structures based on MrgD.

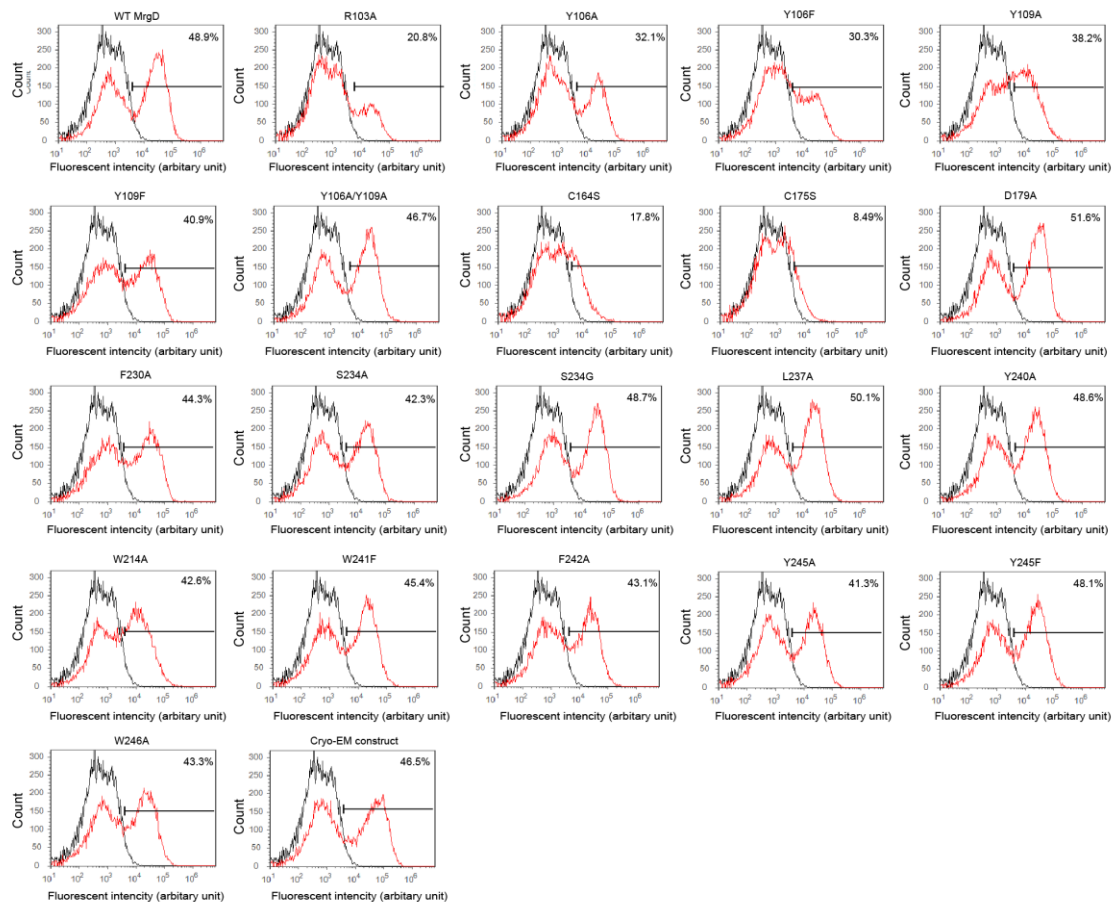

### Supplementary Fig. 7 | Cell-surface expression of WT and mutant MrgD receptors

Cell-surface expression of MrgD analyzed by flow cytometry. Mock transfection and MrgD receptors are shown as black and red histograms, respectively. The black marker designates FLAG positive events. The gated percentage is described in the upper right. The expression levels were decreased by the R103A, C164S, and C175S.

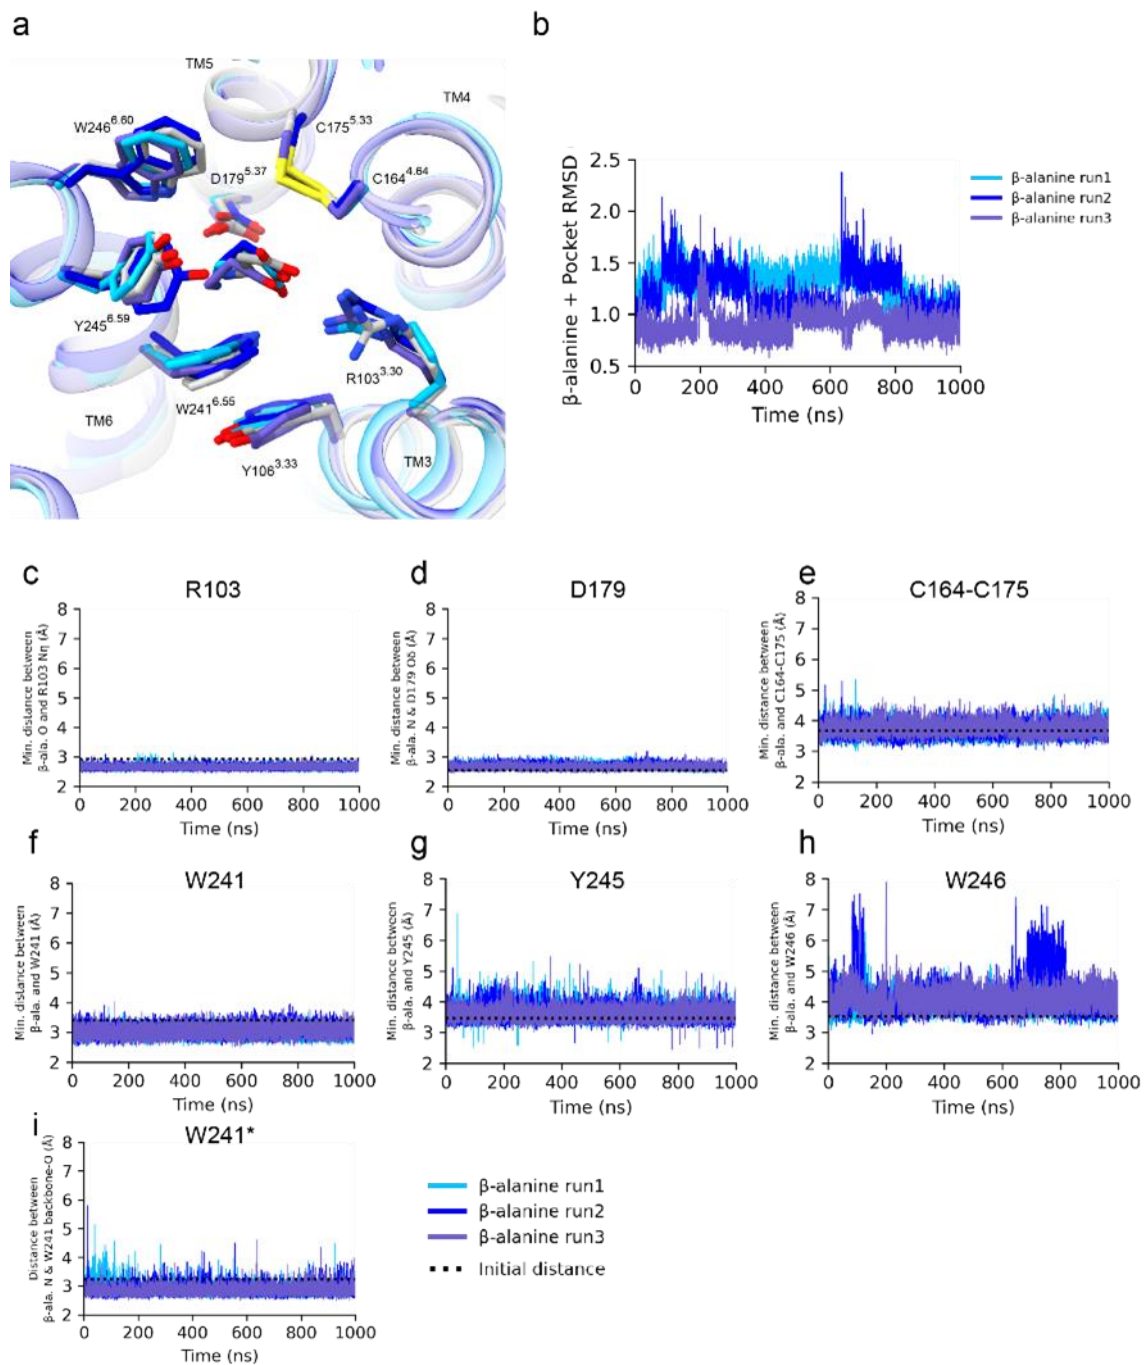

### Supplementary Fig. 8 | MD simulations to assess the binding mode of $\beta$ -alanine

**a** Superposition of the cryo-EM structure (grey) and the last snapshots from the three independent 1  $\mu$ s MD simulations (run1: cyan, run2: blue, run3: slate blue). The snapshots show only minor changes in the ligand-binding pocket compared to the cryo-EM structure. **b** RMSD time course of the atom coordinates of the  $\beta$ -alanine and the residues comprising the binding pocket (R103, C164, C175, D179, W241, Y245 and W246), except hydrogens. The cryo-EM model was used as the

reference for the RMSD calculation. **c-i** Plots of the distances between the  $\beta$ -alanine and the surrounding residues. The initial distances measured in the cryo-EM model were shown as dashed lines. **c** Minimum distance between the two carboxyl O atoms of the  $\beta$ -alanine and the two  $N\eta$  atoms in R103. **d** Minimum distance between the amino N atom of the  $\beta$ -alanine and the two  $O\delta$  atoms of D179. **e-h** Minimum distance between all atoms except hydrogens of the  $\beta$ -alanine and the side chain atoms except  $C\beta$  and hydrogens. **i** Distance between the amino N atom of the  $\beta$ -alanine and the backbone O atom of W241.

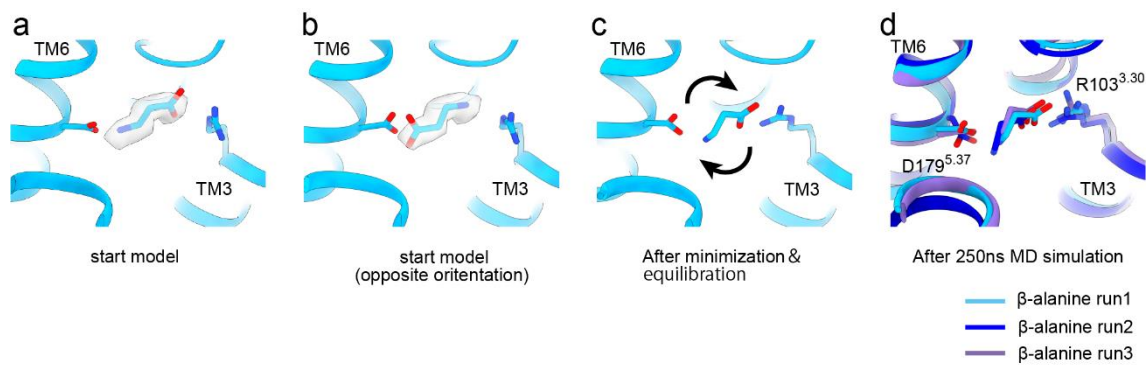

**Supplementary Fig. 9 | MD simulation of  $\beta$ -alanine-bound MrgD started from the oppositely orientated  $\beta$ -alanine**

**a** Original model of  $\beta$ -alanine-bound MrgD. **b** The model of  $\beta$ -alanine-bound MrgD with the  $\beta$ -alanine orientation intentionally reversed. **c** The structure after the energy-minimization and the equilibration. The  $\beta$ -alanine orientation spontaneously reverted back to the original orientation during the equilibration in all three independent runs. Only one of the three runs is shown in the figure for clarity. **d** The structures after the 250 ns production MD run. The orientations of the  $\beta$ -alanine remained the same as in the original model.

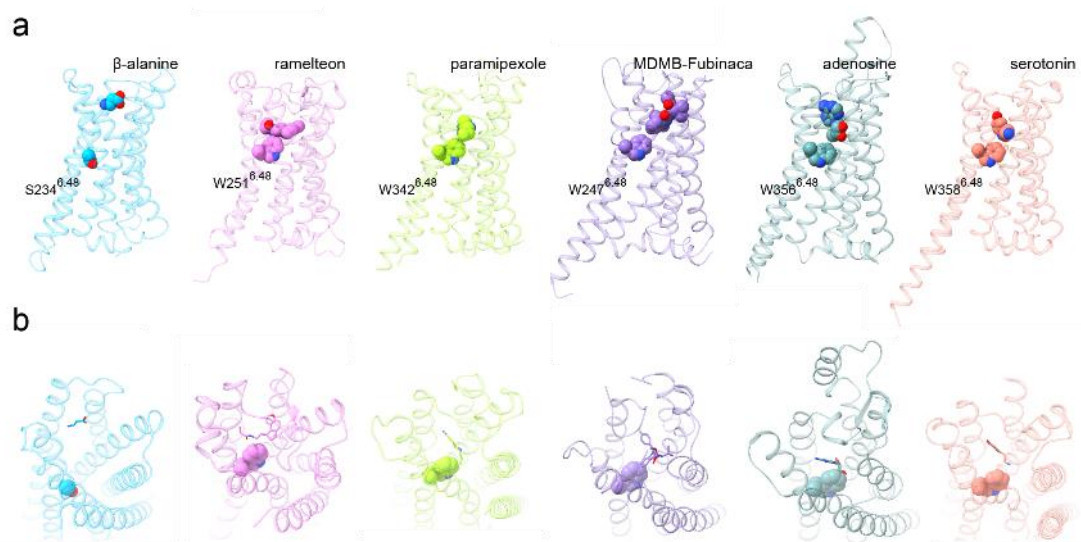

### Supplementary Fig. 10 | Ligand binding positions of GPCRs

Agonists bound to MrgD and other class A GPCRs are shown as cartoon models.  $\beta$ -alanine (cyan, MrgD), ramelteon (pink, MT1R, PDB code: 7DB6), pramipexole (light green, D3R, PDB code: 7CMU), MDMB-Fubinaca (purple, CB1R, PDB code: 6N4B), adenosine (cadet blue, A1R, PDB code: 7LD4), serotonin (light orange, 5HT<sub>1A</sub> PDB code: 7E2Y), and the residues at position 6.48 are shown as sphere models. (a) side view, (b) top view

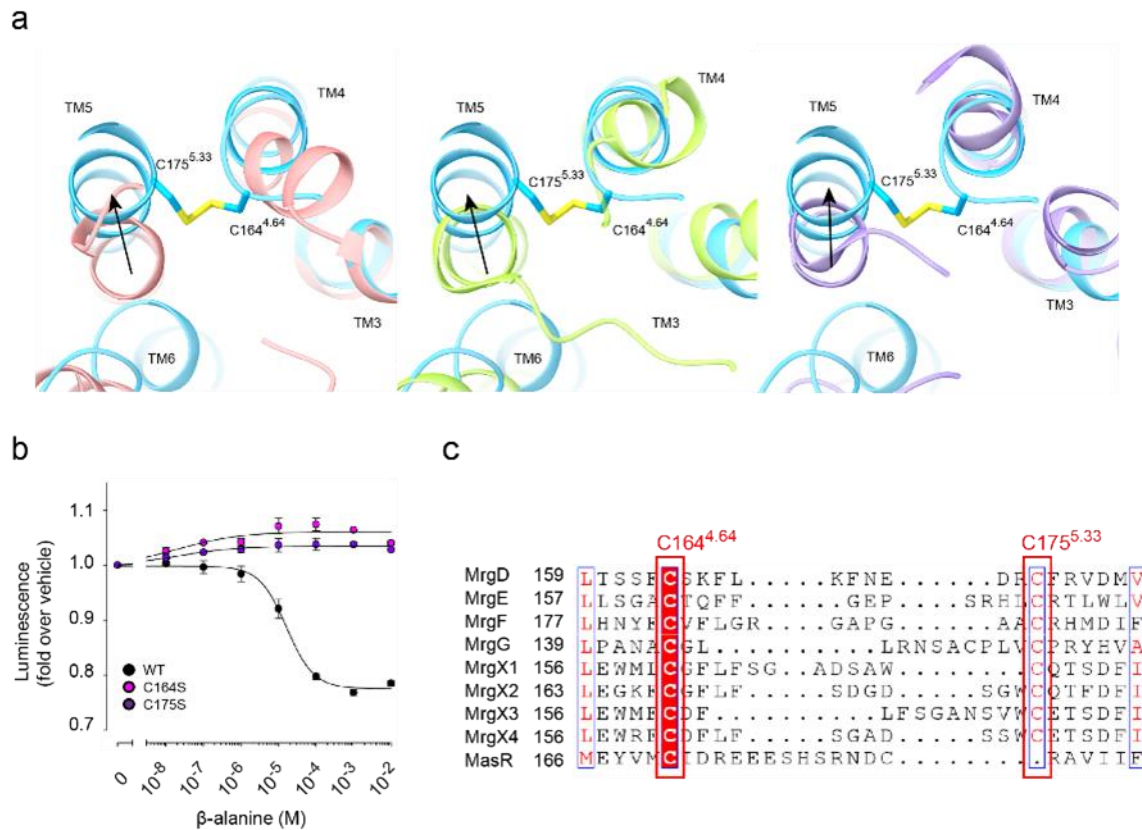

**Supplementary Fig. 11 | A disulfide bond is a component of the ligand-binding pocket**

**a** Comparison of TM4-TM5 helix arrangement with other class A GPCRs. MrgD was compared to AT1R (salmon, PDB code: 6OS0) (left), D3R (green, PDB code: 7CNU) (middle), and CB1 (purple, PDB code: 6N4B) (right) **b** NanoBiT-G-protein dissociation assays for concentration-response curves of G-protein dissociation signals are shown for WT MrgD (black) and C164S (magenta), and C175S (purple). Symbols and error bars represent the mean  $\pm$  s.e.m of six independent experiments for WT and three for the mutants. **c** Sequence alignment of the MRGPR family showing cysteines involved in a disulfide bond. C<sup>4.64</sup> and C<sup>5.33</sup> are conserved in all MRGPR family proteins. Data for the graphs in **d** are available as Supplementary Data 1

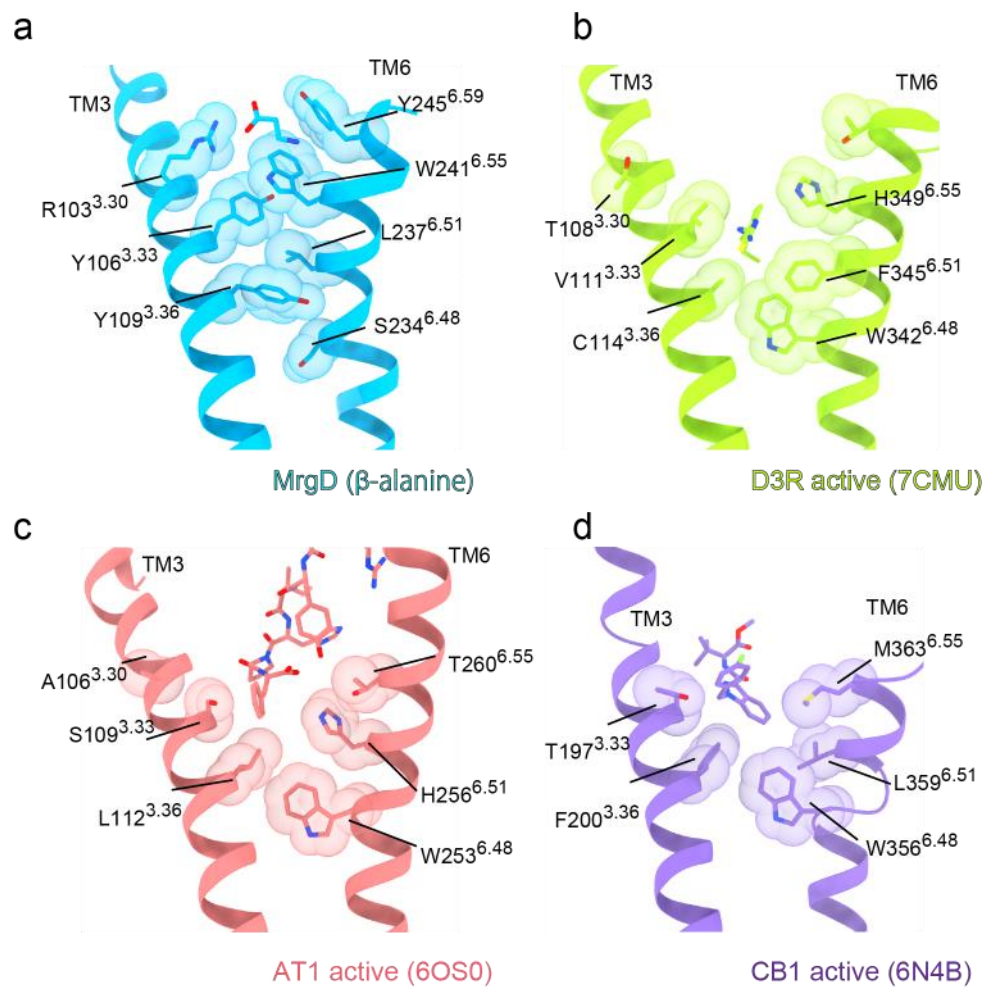

### Supplementary Fig. 12 | Ligand binding site and activation switch

**a-d** Side views of ligand binding site and activation switch of MrgD with  $\beta$ -alanine (a), D3R (green, PDB code: 7CNU) with pramipexole (b), AT1R (salmon, PDB code: 6OS0) with Angiotensin II (c), CB1 (purple, PDB code: 6N4B) with MDMB-Fubinaca (d). The ligands and interacting residues are shown as stick models. Van der Waals surfaces are shown for the interacting residues.



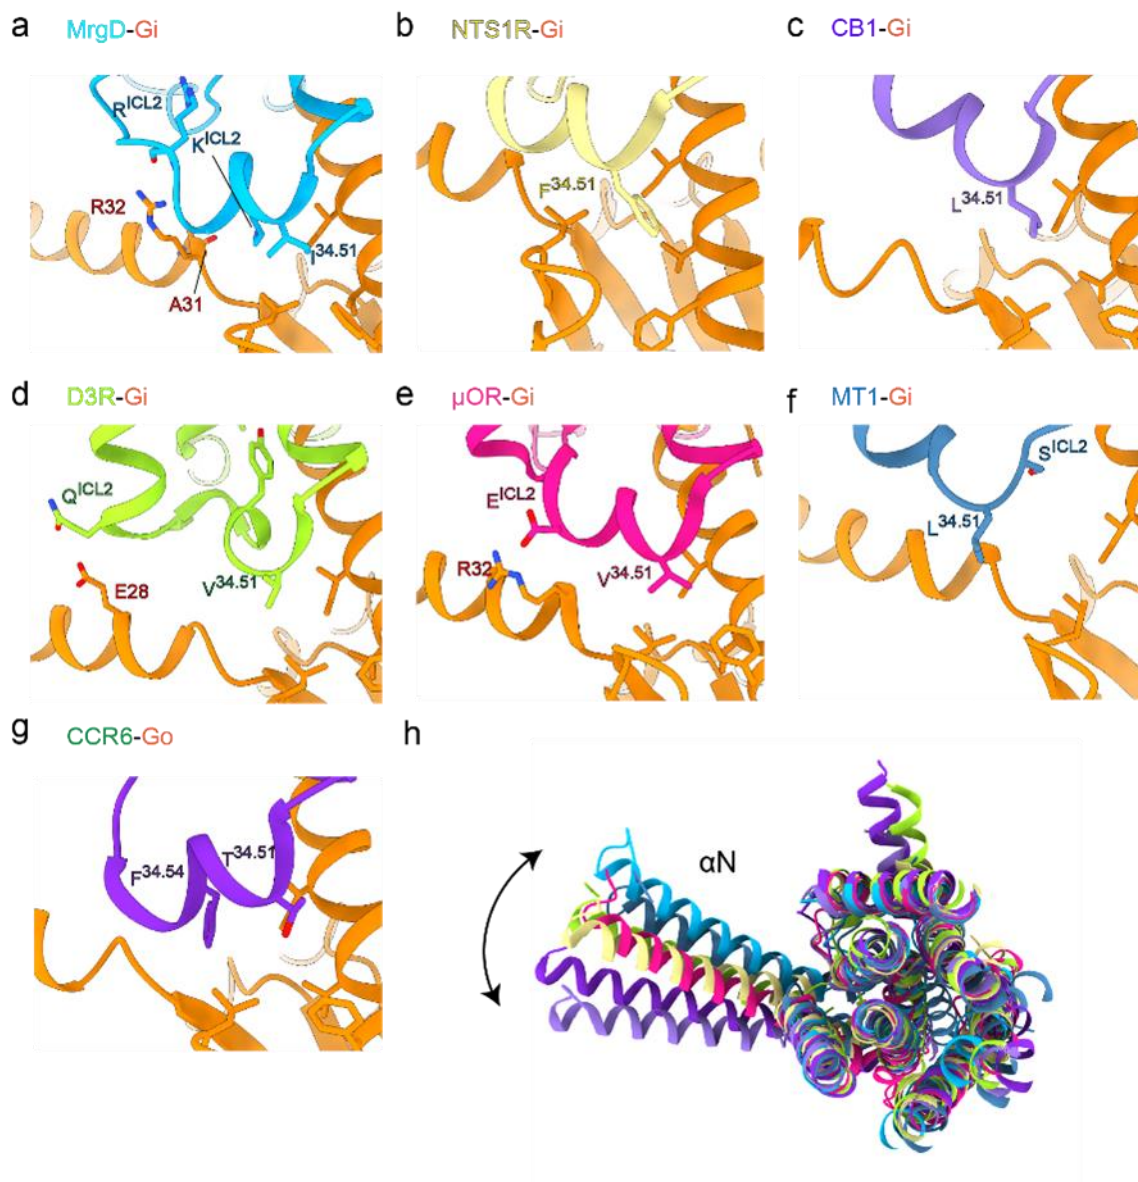

**Supplementary Fig. 13 | Structural comparison of different GPCR-Gi protein interface**

**a-g** Interactions between ICL2 of Receptor and  $\alpha$ N- $\alpha$ 5 of Gi. MrgD-Gi (cyan) (a), NTS1R-Gi (yellow, PDB code; 6OS9) (b), CB1-Gi (orchid, PDB code; 6N4B) (c), D3R-Gi (green, PDB code; 7CMU) (d),  $\mu$ OR-Gi (pink, PDB code; 6DDE) (e), MT1-Gi (blue, PDB code; 7DB6) (f), and CCR6-Go (purple, PDB code; 6WWZ) (g) are represented. **h** Difference in the angle of  $\alpha$ N to Gi. Colors are consistent with (a) to (g).

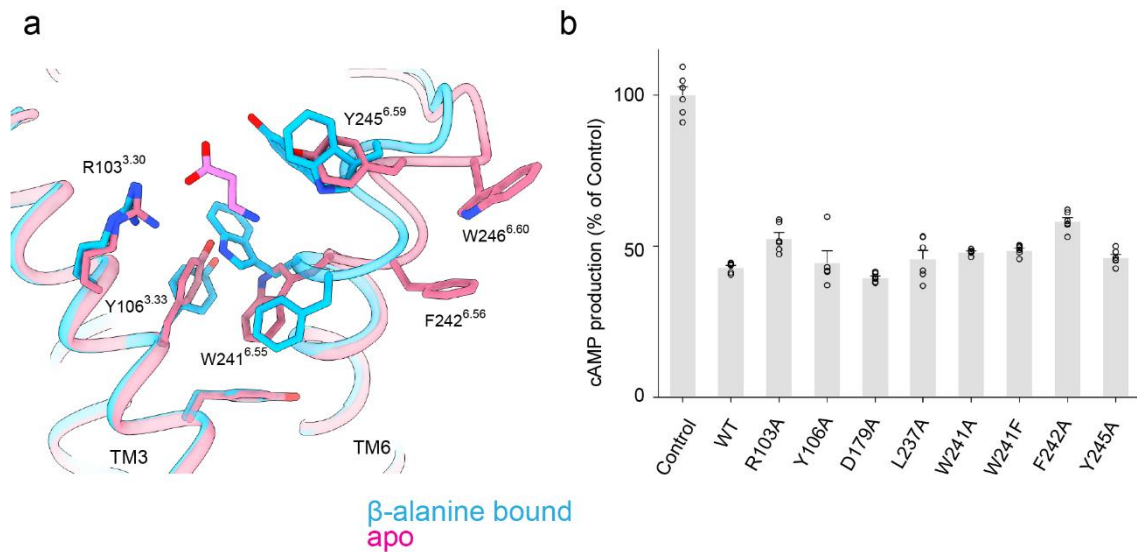

**Supplementary Fig. 14 | Basal activity of MrgD with mutations around the ligand-binding site**

**a** Magnified view of the ligand-binding pocket of  $\beta$ -alanine-bound MrgD (cyan) and the apo MrgD (red). The residues of interest are shown as sticks. **b** Basal activity of WT MrgD and mutants measured by cAMP inhibition assay. Bars represent mean  $\pm$  s.e.m (n=5-6). The expression levels of these mutants at the cell surface were comparable to the wild type (Supplementary Fig.6). Data for the graphs in **d** are available as Supplementary Data 2

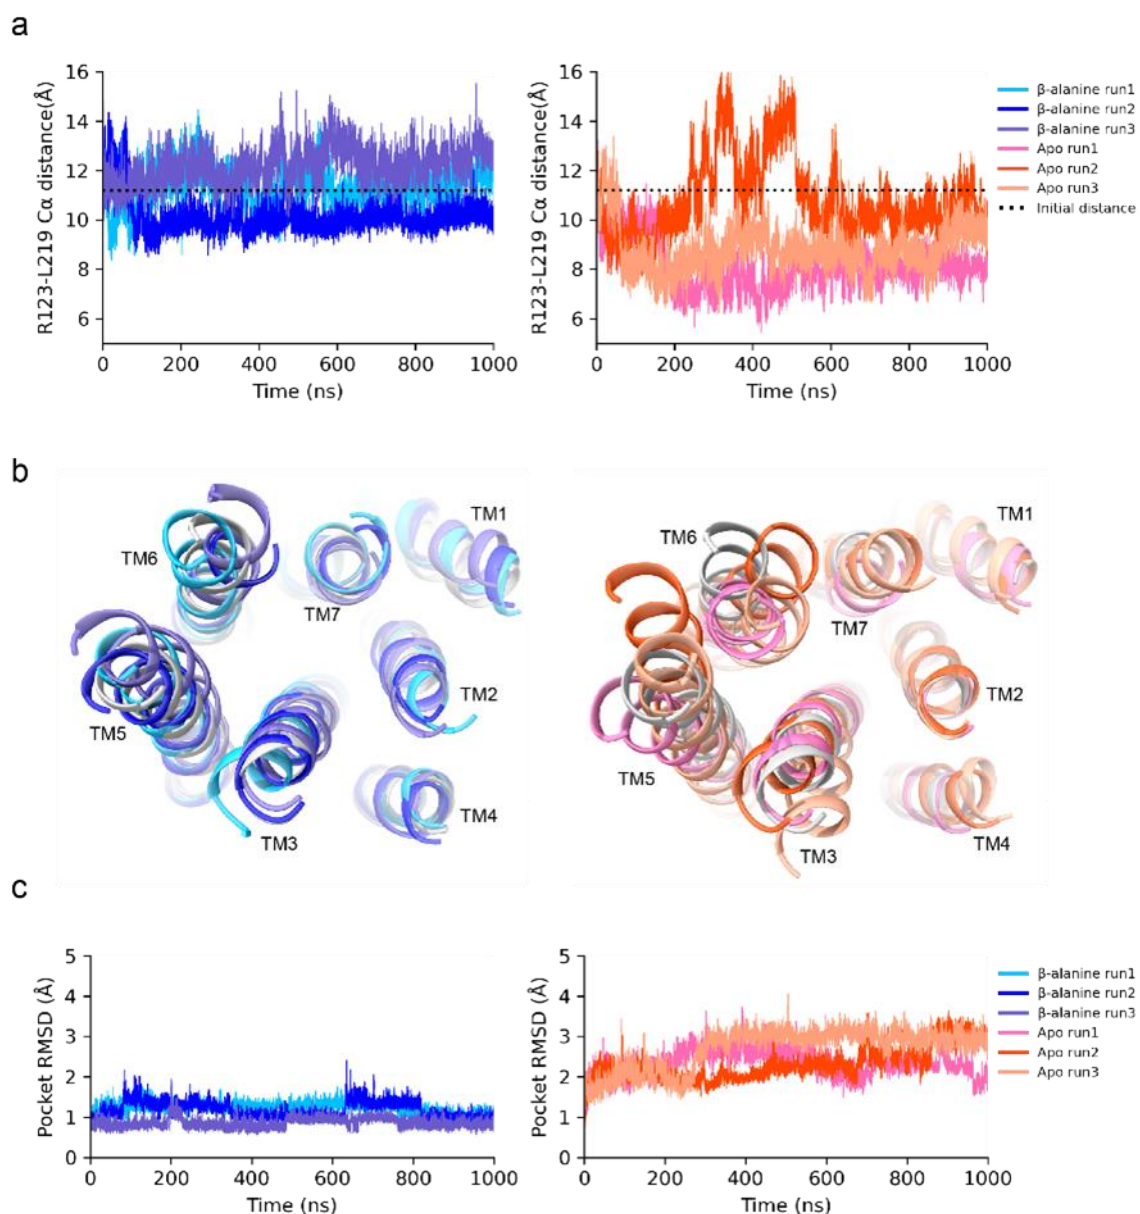

**Supplementary Fig. 15 | MD simulations of MrgD in the apo and  $\beta$ -alanine-bound states**

**a** TM6 displacement shown by the C $\alpha$  distance between R123<sup>3,50</sup> and L219<sup>6,33</sup>. The initial distances measured in the cryo-EM models were marked as dashed lines. The  $\beta$ -alanine-bound state is shown left. The apo state is shown right. **b** Comparison of the helix arrangement on the cytoplasmic side shown by superimposing the active state structure of MrgD (grey) on the last MD snapshots of the  $\beta$ -alanine-bound state (left) and the apo state (right). The coloring is the same as in **a**. **c** RMSD time course of the atom coordinates of the residues comprising the binding pocket (R103, C164, C175, D179, W241, Y245, and W246), except hydrogens. RMSDs from the three independent runs were shown for each state. The cryo-EM models were used as the references for RMSD calculations. The coloring is the same as in **a**

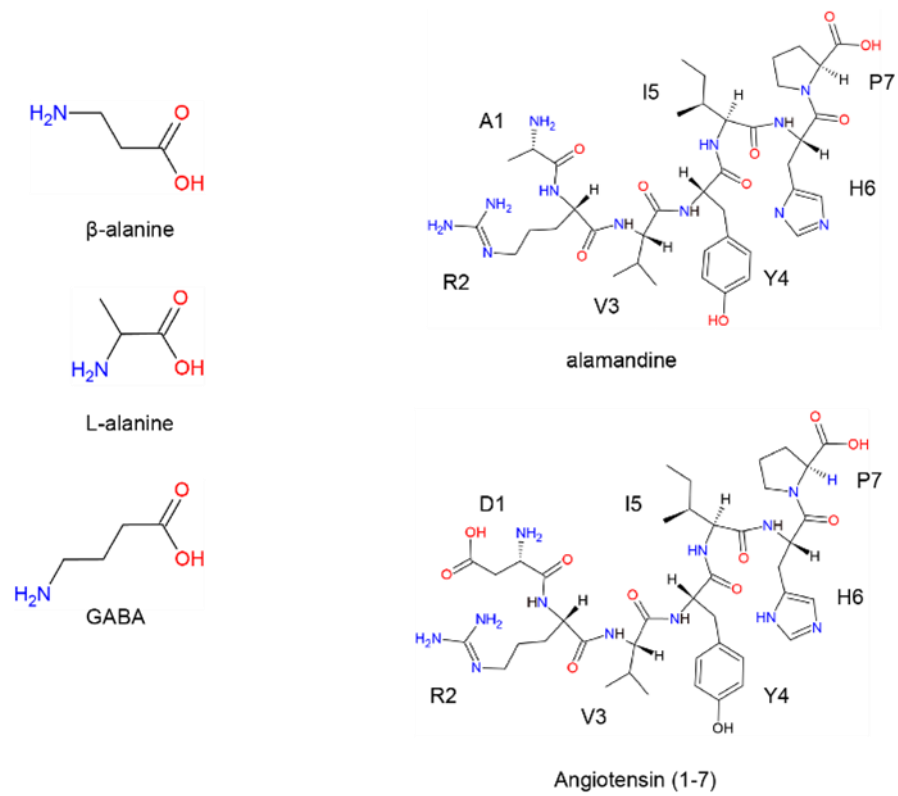

**Supplementary Fig. 16 | Chemical structures of MrgD agonists**

Two-dimensional representation of chemical structures of β-alanine, L-alanine, Gamma-Amino Butyric Acid (GABA), Alamandine and Angiotensin (1-7).

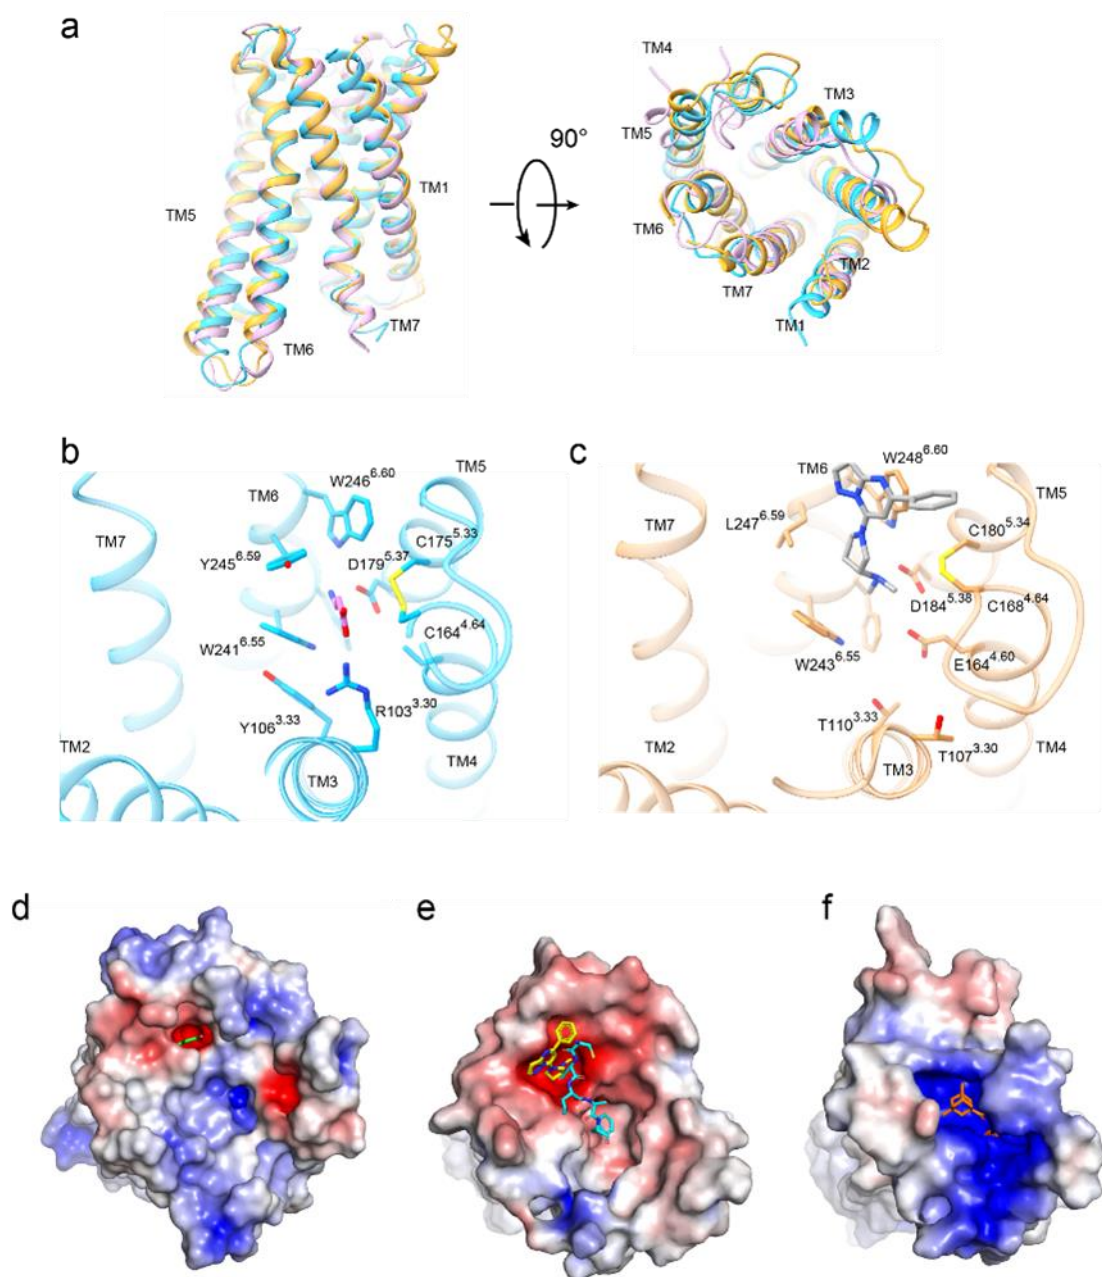

### Supplementary Fig. 17 | Structural features of the MRGPR family

**a** Superposition of MrgD and MrgprX2 (orange, PDB code; 7S8O) and MrgprX4 (pink, PDB code; 7S8P). **b,c** Ligand-binding pocket. The side chains contributing to ligand binding are shown as stick models (b) MrgD, (c) MrgprX2. **d-f** Electrostatic surface representation of the (d) MrgD, (e) MrgprX2, (f) MrgprX4 extracellular pocket calculated using the APBS plugin in PyMOL, with  $\beta$ -alanine shown as a green stick and (R)-ZINC-3573 as a yellow stick, Cortistatin-14 as a cyan stick, and MS47134 as a pink stick.
