# Supplementary material for: Structural insight into the activation mechanism of MrgD with heterotrimeric Gi-protein revealed by cryo-EM
Source: PubMed Central journal article supplement (PMC9287403; doi:10.1038/s42003-022-03668-3), 2022-07-15
Supplement: 42003_2022_3668_MOESM3_ESM.pdf [file 42003_2022_3668_MOESM3_ESM.pdf]

## **Description of Additional Supplementary Files**

**File Name:** Supplementary Data 1

**Description:** Source data underlying Figures 2f, 4c, and Supplementary Figures 1b and 11b.

**File Name:** Supplementary Data 2

**Description:** Source data underlying Figure 6d and Supplementary Figure 14
